# Supplementary material
Source: PubMed Central journal article supplement (PMC1426986)
Supplement: aac_50_4_1148__1.pdf [file aac_50_4_1148__1.pdf]

**Supplementary Material FIG. S1**

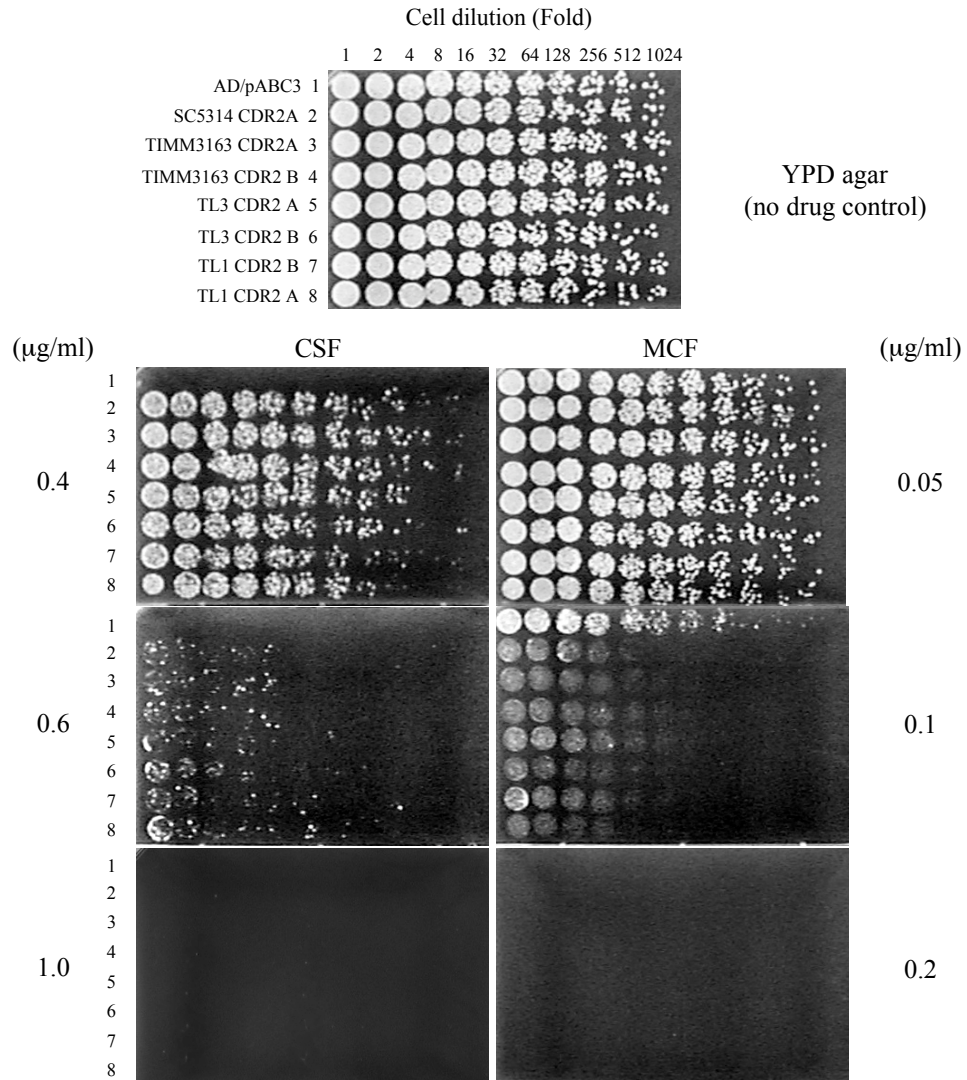

CSF and MCF susceptibility of *S. cerevisiae* cells hyper-expressing *C. albicans* CDR2 in agar plate assays. CDR2 A and B alleles were cloned from the indicated *C. albicans* strains (Table 1). The agar plate resistance assay was performed as for Fig. 1.
