# Supplementary material
Source: PubMed Central journal article supplement (PMC1426986)
Supplement: aac_50_4_1148__2.pdf [file aac_50_4_1148__2.pdf]

**Supplementary Material FIG. S2**

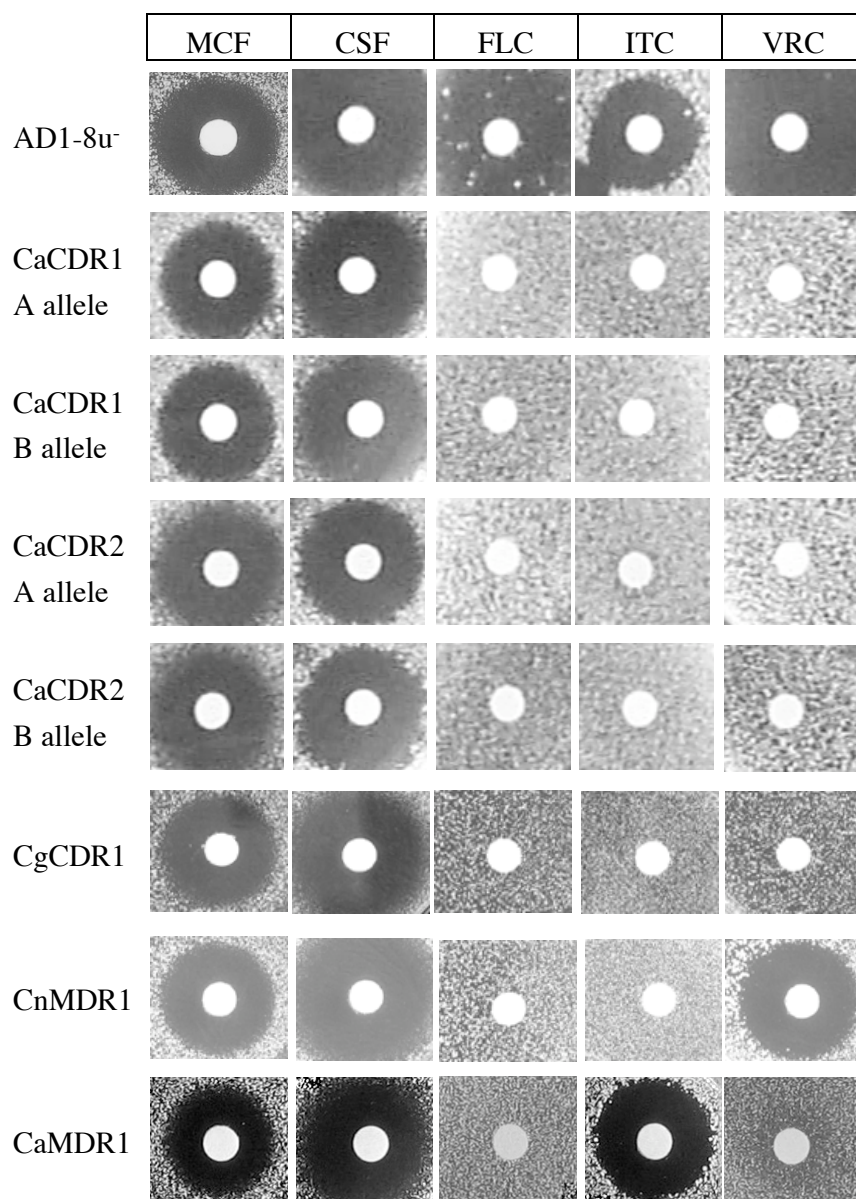

Agarose drug diffusion susceptibility of *S. cerevisiae* strains hyper-expressing membrane transporters to candins and azoles on CSM agarose. Amounts ( $\mu\text{g}$ ) of drugs applied per disk were MCF 2; CSF 1; FLC 5; ITC 0.5; VRC 0.2. CSF was more potent in CSM agarose than in CSM agar because reduced amounts of the drug (1  $\mu\text{g}$  rather than 2  $\mu\text{g}$ /disk) gave inhibitory zones comparable to those for 2  $\mu\text{g}$ /disk MCF (data not shown).
