# Supplementary material
Source: PubMed Central journal article supplement (PMC1426986)
Supplement: aac_50_4_1148__3.pdf [file aac_50_4_1148__3.pdf]

**Supplementary Material TABLE 1.** *S. cerevisiae* strains used in this study

| Strain                                             | Source of cloned gene         | Genotype <sup>a</sup>                                                                                                                                                                                                |
|----------------------------------------------------|-------------------------------|----------------------------------------------------------------------------------------------------------------------------------------------------------------------------------------------------------------------|
| AD12345678u <sup>-</sup><br>(AD1-8u <sup>-</sup> ) |                               | <i>Mata</i> <i>pdr1-3 ura3 his1 yor1</i> Δ:: <i>hisG snq2</i> Δ:: <i>hisG pdr10</i> Δ:: <i>hisG pdr11</i> Δ:: <i>hisG ycf</i> Δ:: <i>hisG pdr3</i> Δ:: <i>hisG pdr15</i> Δ:: <i>hisG pdr5</i> Δ:: <i>hisG</i>        |
| AD/pABC3                                           | None (plasmid vector control) | <i>Mata</i> <i>pdr1-3 ura3 his1 yor1</i> Δ:: <i>hisG snq2</i> Δ:: <i>hisG pdr10</i> Δ:: <i>hisG pdr11</i> Δ:: <i>hisG ycf</i> Δ:: <i>hisG pdr3</i> Δ:: <i>hisG pdr15</i> Δ:: <i>hisG pdr5</i> Δ:: <i>URA3</i>        |
| AD/CaMDR1                                          | CaATCC10261                   | <i>Mata</i> <i>pdr1-3 ura3 his1 yor1</i> Δ:: <i>hisG snq2</i> Δ:: <i>hisG pdr10</i> Δ:: <i>hisG pdr11</i> Δ:: <i>hisG ycf</i> Δ:: <i>hisG pdr3</i> Δ:: <i>hisG pdr15</i> Δ:: <i>hisG pdr5</i> Δ:: <i>MDR1-URA3</i>   |
| AD/CaCDR1A                                         | CaATCC10261                   | <i>Mata</i> <i>pdr1-3 ura3 his1 yor1</i> Δ:: <i>hisG snq2</i> Δ:: <i>hisG pdr10</i> Δ:: <i>hisG pdr11</i> Δ:: <i>hisG ycf</i> Δ:: <i>hisG pdr3</i> Δ:: <i>hisG pdr15</i> Δ:: <i>hisG pdr5</i> Δ:: <i>CDR1A-URA3</i>  |
| AD/CaCDR1B                                         | CaATCC10261                   | <i>Mata</i> <i>pdr1-3 ura3 his1 yor1</i> Δ:: <i>hisG snq2</i> Δ:: <i>hisG pdr10</i> Δ:: <i>hisG pdr11</i> Δ:: <i>hisG ycf</i> Δ:: <i>hisG pdr3</i> Δ:: <i>hisG pdr15</i> Δ:: <i>hisG pdr5</i> Δ:: <i>CDR1B-URA3</i>  |
| AD/CaCDR2A                                         | CaATCC10261                   | <i>Mata</i> <i>pdr1-3 ura3 his1 yor1</i> Δ:: <i>hisG snq2</i> Δ:: <i>hisG pdr10</i> Δ:: <i>hisG pdr11</i> Δ:: <i>hisG ycf</i> Δ:: <i>hisG pdr3</i> Δ:: <i>hisG pdr15</i> Δ:: <i>hisG pdr5</i> Δ:: <i>CDR2A-URA3</i>  |
| AD/CaCDR2B                                         | CaATCC10261                   | <i>Mata</i> <i>pdr1-3 ura3 his1 yor1</i> Δ:: <i>hisG snq2</i> Δ:: <i>hisG pdr10</i> Δ:: <i>hisG pdr11</i> Δ:: <i>hisG ycf</i> Δ:: <i>hisG pdr3</i> Δ:: <i>hisG pdr15</i> Δ:: <i>hisG pdr5</i> Δ:: <i>CDR2B-URA3</i>  |
| AD/CaCDR2A                                         | CaSC5314                      | <i>Mata</i> <i>pdr1-3 ura3 his1 yor1</i> Δ:: <i>hisG snq2</i> Δ:: <i>hisG pdr10</i> Δ:: <i>hisG pdr11</i> Δ:: <i>hisG ycf</i> Δ:: <i>hisG pdr3</i> Δ:: <i>hisG pdr15</i> Δ:: <i>hisG pdr5</i> Δ:: <i>CDR2A-URA3</i>  |
| AD/CaCDR2A                                         | CaTIMM3163                    | <i>Mata</i> <i>pdr1-3 ura3 his1 yor1</i> Δ:: <i>hisG snq2</i> Δ:: <i>hisG pdr10</i> Δ:: <i>hisG pdr11</i> Δ:: <i>hisG ycf</i> Δ:: <i>hisG pdr3</i> Δ:: <i>hisG pdr15</i> Δ:: <i>hisG pdr5</i> Δ:: <i>CDR2A-URA3</i>  |
| AD/CaCDR2B                                         | CaTIMM3163                    | <i>Mata</i> <i>pdr1-3 ura3 his1 yor1</i> Δ:: <i>hisG snq2</i> Δ:: <i>hisG pdr10</i> Δ:: <i>hisG pdr11</i> Δ:: <i>hisG ycf</i> Δ:: <i>hisG pdr3</i> Δ:: <i>hisG pdr15</i> Δ:: <i>hisG pdr5</i> Δ:: <i>CDR2B-URA3</i>  |
| AD/CaCDR2A                                         | CaTL1                         | <i>Mata</i> <i>pdr1-3 ura3 his1 yor1</i> Δ:: <i>hisG snq2</i> Δ:: <i>hisG pdr10</i> Δ:: <i>hisG pdr11</i> Δ:: <i>hisG ycf</i> Δ:: <i>hisG pdr3</i> Δ:: <i>hisG pdr15</i> Δ:: <i>hisG pdr5</i> Δ:: <i>CDR2A-URA3</i>  |
| AD/CaCDR2B                                         | CaTL1                         | <i>Mata</i> <i>pdr1-3 ura3 his1 yor1</i> Δ:: <i>hisG snq2</i> Δ:: <i>hisG pdr10</i> Δ:: <i>hisG pdr11</i> Δ:: <i>hisG ycf</i> Δ:: <i>hisG pdr3</i> Δ:: <i>hisG pdr15</i> Δ:: <i>hisG pdr5</i> Δ:: <i>CDR2B-URA3</i>  |
| AD/CaCDR2A                                         | CaTL3                         | <i>Mata</i> <i>pdr1-3 ura3 his1 yor1</i> Δ:: <i>hisG snq2</i> Δ:: <i>hisG pdr10</i> Δ:: <i>hisG pdr11</i> Δ:: <i>hisG ycf</i> Δ:: <i>hisG pdr3</i> Δ:: <i>hisG pdr15</i> Δ:: <i>hisG pdr5</i> Δ:: <i>CDR2A-URA3</i>  |
| AD/CaCDR2B                                         | CaTL3                         | <i>Mata</i> <i>pdr1-3 ura3 his1 yor1</i> Δ:: <i>hisG snq2</i> Δ:: <i>hisG pdr10</i> Δ:: <i>hisG pdr11</i> Δ:: <i>hisG ycf</i> Δ:: <i>hisG pdr3</i> Δ:: <i>hisG pdr15</i> Δ:: <i>hisG pdr5</i> Δ:: <i>CDR2B-URA3</i>  |
| AD/CgCDR1                                          | CgCBS138                      | <i>Mata</i> <i>pdr1-3 ura3 his1 yor1</i> Δ:: <i>hisG snq2</i> Δ:: <i>hisG pdr10</i> Δ:: <i>hisG pdr11</i> Δ:: <i>hisG ycf</i> Δ:: <i>hisG pdr3</i> Δ:: <i>hisG pdr15</i> Δ:: <i>hisG pdr5</i> Δ:: <i>CgCDR1-URA3</i> |
| AD/CnMDR1                                          | CnCDC551                      | <i>Mata</i> <i>pdr1-3 ura3 his1 yor1</i> Δ:: <i>hisG snq2</i> Δ:: <i>hisG pdr10</i> Δ:: <i>hisG pdr11</i> Δ:: <i>hisG ycf</i> Δ:: <i>hisG pdr3</i> Δ:: <i>hisG pdr15</i> Δ:: <i>hisG pdr5</i> Δ:: <i>CnMDR1-URA3</i> |
| AD/PDR5                                            | ScAD124567                    | <i>Mata</i> <i>pdr1-3 ura3 his1 yor1</i> Δ:: <i>hisG snq2</i> Δ:: <i>hisG pdr10</i> Δ:: <i>hisG pdr11</i> Δ:: <i>hisG ycf</i> Δ:: <i>hisG pdr3</i> Δ:: <i>hisG pdr15</i> Δ:: <i>hisG pdr5</i> Δ:: <i>PDR5-URA3</i>   |

<sup>a</sup> Separate alleles of each transporter gene from *C. albicans* strains are designated A or B
